# Supplementary figures and images for: CART neurons in the arcuate nucleus and lateral hypothalamic area exert differential controls on energy homeostasis
Source: PubMed Central journal article supplement — Mol Metab. 2017 Nov 8;7:102–18. doi: 10.1016/j.molmet.2017.10.015 (PMC5784325; doi:10.1016/j.molmet.2017.10.015), 2017-11-08

# Supplementary figure S1

Arc

LHA

A

B

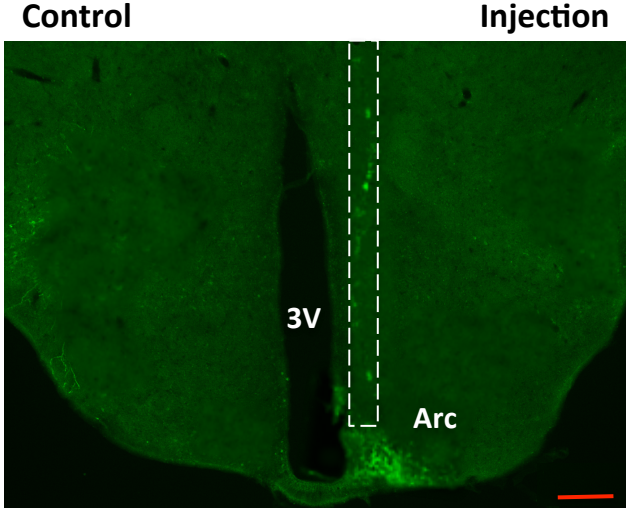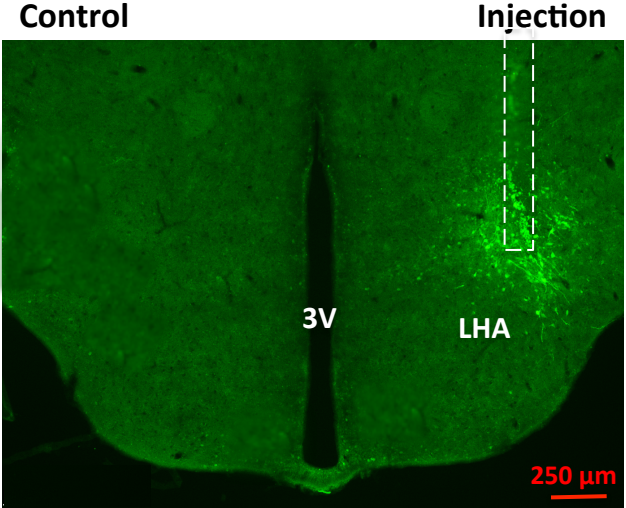

Supplement: mmc1.pdf [file mmc1.pdf]

# Supplementary figure S2

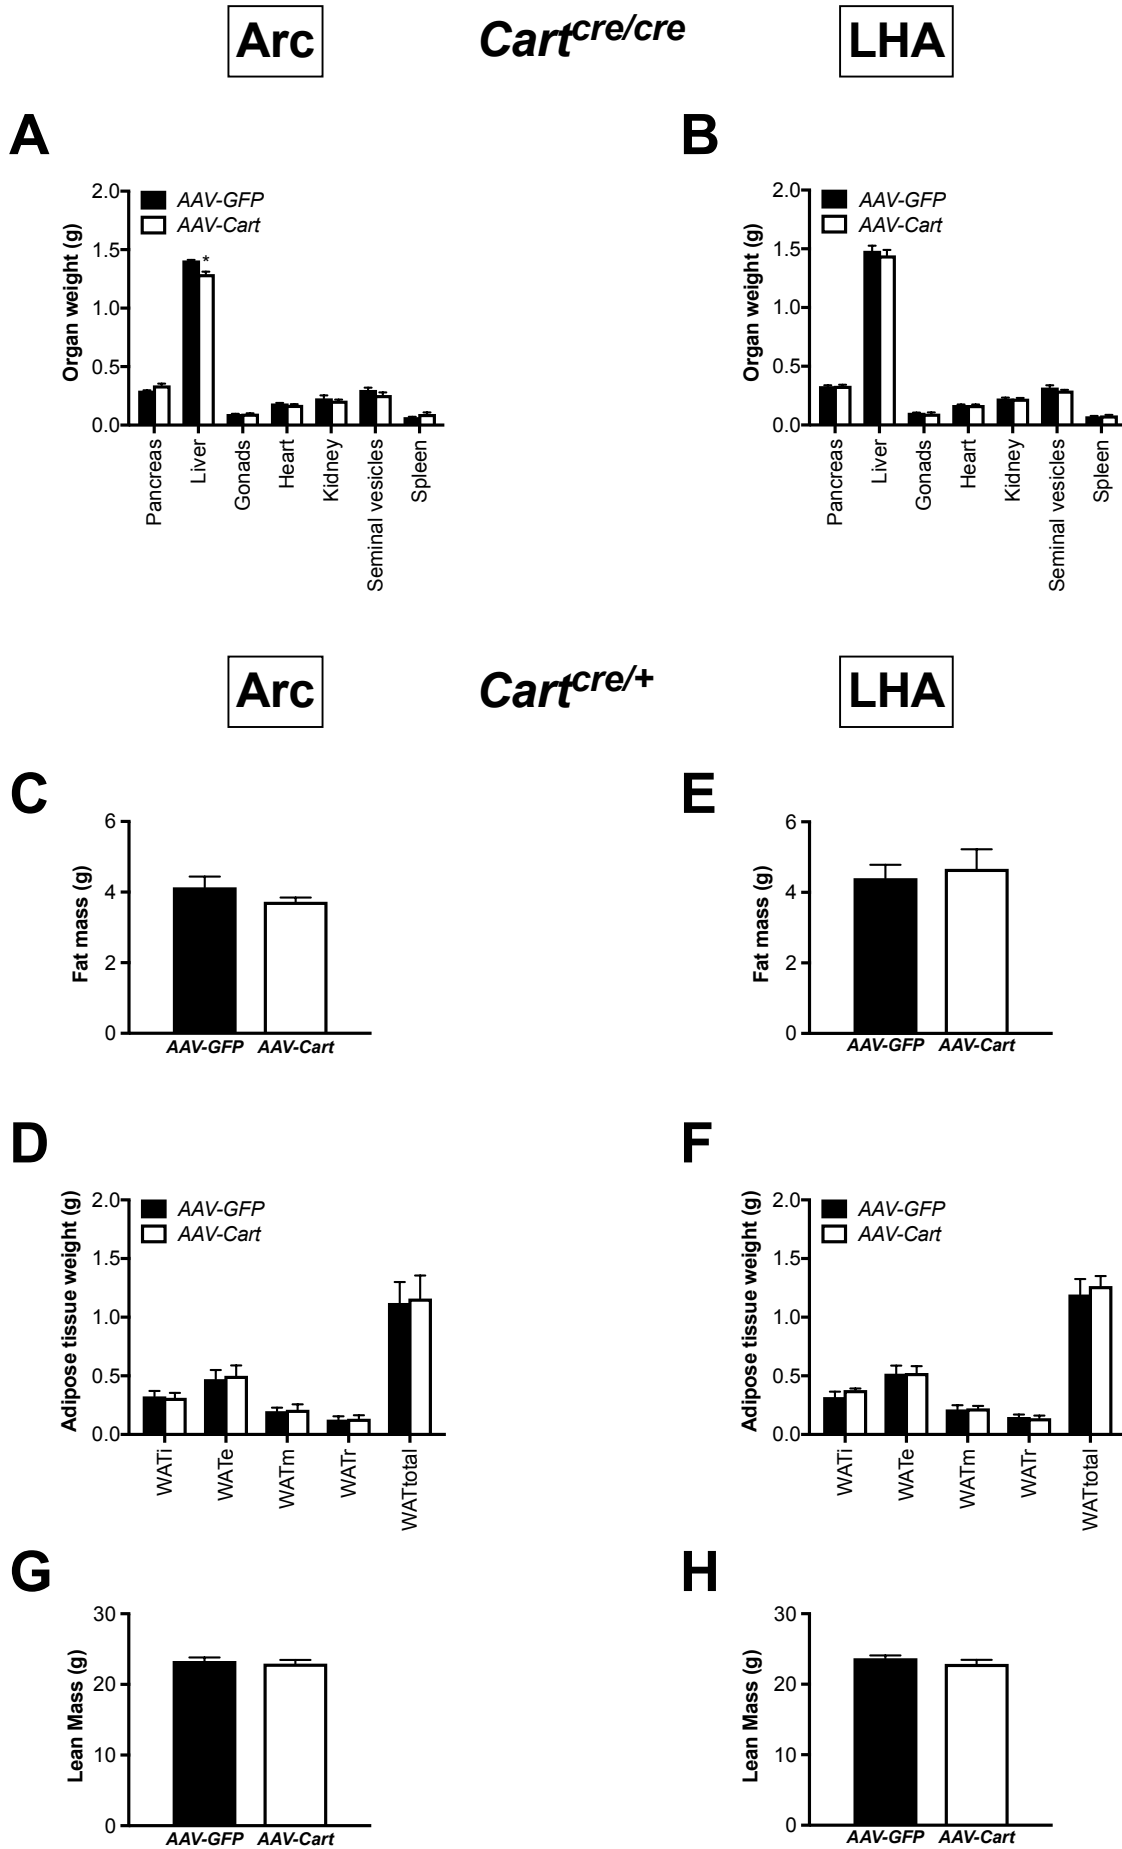

Supplement: mmc2.pdf [file mmc2.pdf]

# Supplementary figure S3

Arc

*Cart<sup>cre/cre</sup>*

LHA

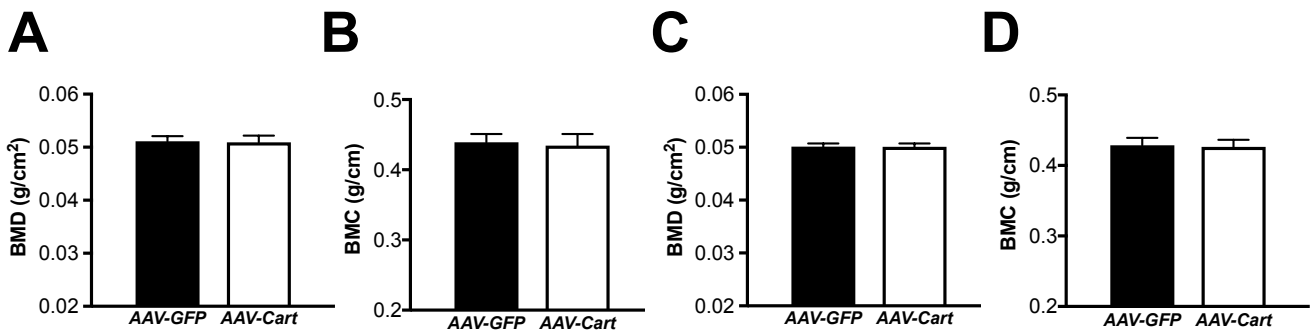

Arc

*Cart<sup>cre/+</sup>*

LHA

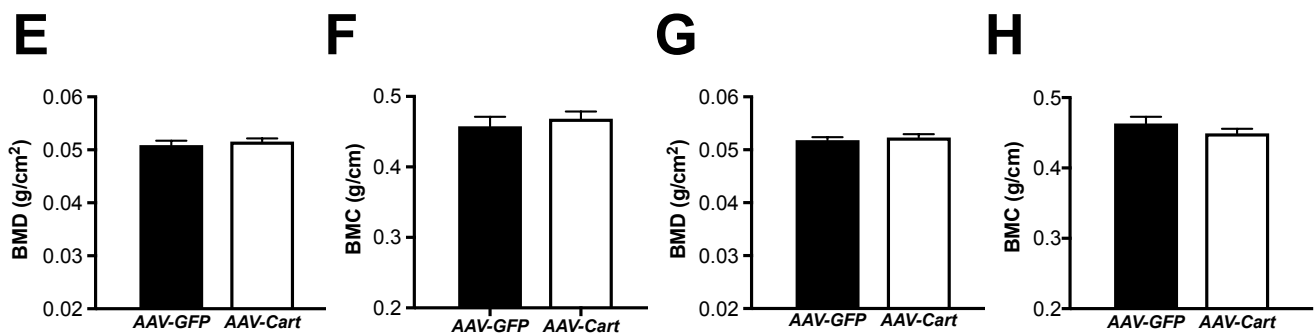

Supplement: mmc3.pdf [file mmc3.pdf]

# Supplementary figure S4

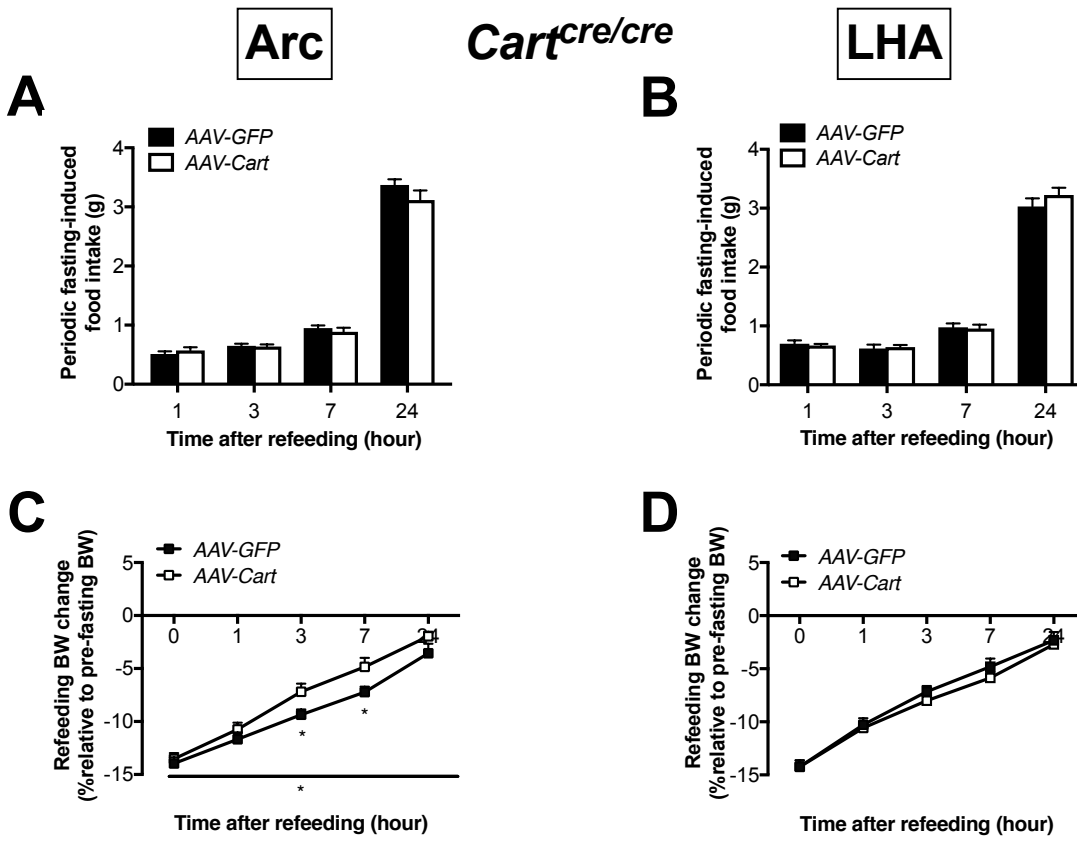

Supplement: mmc4.pdf [file mmc4.pdf]
